# Supplementary material for: Glyco-STORM: Nanoscale Mapping of the Cellular Glycosylation Landscape
Source: Research Square preprint supplement (doi:10.21203/rs.3.rs-6067166/v1), 2025-03-11
Supplement: Supplementary file 3 [file abad665752ee74108a67d1fa.docx]

**Supplementary Tables**

## Supplementary Table 1 | Properties of lectins used in this study

| **Lectin;  Organism** | **Size [kDa]; Subunits** | **Preferred binding motifs** |
| --- | --- | --- |
| ABA;   *Agaricus bisporus* | 60; 41 | N-glycans: biantennary, β-GlcNAc terminated2;N-glycans: biantennary, LacNAc terminated2; O-glycans: core 2 (GlcNAcβ1-6(Galβ1-3)GalNAc)2 |
| CAL;   *Cicer arietinum* | 43; 23 | N-glycans: complex carbohydrates3; GalNAc4 |
| Con A;   *Canavalia ensiformis* | 104; 45 | N-glycans: α-Man, terminal (Man3 to Man9)2;N-glycans: biantennary with most extensions (no terminus-proximal α-Fuc)2 |
| DBA;   *Dolichos biflorus* | 111; 46 | Forssman antigen (GalNAcα1-3GalNAcβ1-3Galα1-4Galβ1-4Glc)2,7; GalNAcα1-3GalNAc7;  β-GalNAc2; α-GalNAc7,8;  GalNAcα1-3(Fucα1-2)Gal7; |
| HHA;   *Hippeastrum hybrid* | 48; 49 | N-glycans: Man, terminal: Manα1-6(Manα1-3)Man2; Man5>Man6>Man72 |
| LCA;   *Lens culinaris* | 48; 49 | N-glycans: Fuc, core (Fucα1-6)2; Man, terminal (Manα1-2)2 |
| LTL;   *Lotus tetragonolobus* | 105; 410 | LewisX: Galβ1-4(Fucα1-3)GlcNAc2;Fucα1-32;Lewisy: Fucα1-2Galβ1-4(Fucα1-3)GlcNAc2 |
| MAA II;  *Maackia amurensis* | 130; 411 | O-Glycan: SA α2-3-linked to Galβ1-3GalNAc2; 3’ sulfated β-Gal2 |
| PNA;   *Arachis hypogaea* | 110; 4 | O-Glycan: Galβ1-3GalNAc, terminal2; |
| POL;   *Polygonatum odoratum* | 48; 412 | N-glycans: Man3 (Manα1-3(Manα1-6)Man12); Man2>Man112 |
| PSA;   *Pisum sativum* | 50; 413,14 | Fuc, core (Fucα1-6), tolerating SA, Gal, GlcNAc2; Man15 |
| PWA;   *Phytolacca americana* | 32; 116 | Chitin oligomers (GlcNAcβ1-4)n (n ≥ 4), terminal2 poly-LacNAc17 |
| UDA;   *Urtica dioica* | 9; 118 | Manα1-6, terminal Man3 to Man9, with chitobiose core2;(poly-)LacNAc2; Chitin oligomers (GlcNAcβ1-4)n2 |
| UEA I;   *Ulex europaeus* | 63; 219 | Type 2 blood group H (Fucα1-2Galβ1-4GlcNAc)2; Fuc (Fucα1-2Galβ1-4Glc)2;Lewisy (Fucα1-2Galβ1-4(Fucα1-3)GlcNAc)2 |
| VEA;   *Vicia ervilia* | 60; 420 | α-Man20; α-Glc20,21 |
| VVA A+B;   *Vicia villosa* | 136; 4 & 144; 49 | GalNAcβ1-4GlcNAc2; α/β-GalNAc, terminal2;LacNAc, terminal, multiantennary2 |
| WGA;   *Triticum aestivum* | 36; 222 | β-GlcNAc, terminal2; α-GlcNAc, terminal2;  α/β-GalNAc2; SA: α-Neu5Ac24Glc |

The first entry for each lectin indicates the predominant binding motif. Abbreviations: Fuc, fucose; Gal, galactose; GalNAc, N-acetylgalactosamine; Glc, glucose; GlcNAc, N-acetylglucosamine; LacNAc, N-acetyllactosamine; Man, mannose; Neu5Ac, N-acetylneuraminic acid; SA, sialic acid.

## Supplementary Table 2 | Lectin-fluorophore conjugates used in this study

| **Lectin** | **Conju-gate** | **Used dilution** | **Recommended/ applied ions** | **Order №** | **Lot №** |
| --- | --- | --- | --- | --- | --- |
| ABA | AF647 | 1:20 | - | 21511446a | L20061809ZH |
| CAL | AF647 | 1:20 | Ca2+, Mg2+ | 21511589a | L20110609ZH |
| Con A | AF647 | 1:20 | Ca2+, Mn2+ | 21511462a | L20042403ZH |
| Con A | CF680 | 1:200 | Ca2+, Mn2+ | 29020b | 21C0720-1164044 |
| DBA | AF647 | 1:20 | Ca2+, Mg2+, Mn2+, Zn2+ | 21511470a | L20110605ZH |
| HHA | AF647 | 1:5 | - | 21511503a | L20090406ZH |
| LCA | AF647 | 1:20 | Ca2+, Mg2+ | 21511511a | L20110606ZH |
| LTL | AF647 | 1:20 | Ca2+, Mn2+ | 21511594a | L20110612ZH |
| MAA II | AF647 | 1:20 | - | 21511531a | L20110607ZH |
| PNA | AF647 | 1:20 | Ca2+, Mg2+ | 21511454a | L20110604ZH |
| POL | AF647 | 1:20 | Ca2+, Mn2+ | 21511595a | L20110613ZH |
| PSA | AF647 | 1:100 | Ca2+, Mn2+ | 21511543a | L20110611ZH |
| PWA | AF647 | 1:20 | - | 21511588a | L20110608ZH |
| UDA | AF647 | 1:100 | Zn2+ | 21511581a | L20052206ZH |
| UEA I | DL649 | 1:20 | Ca2+, Mn2+, Zn2+ | BL-21068c | ZD1130 |
| VEA | AF647 | 1:20 | - | 21511591a | L20110610ZH |
| VVA A+B | AF647 | 1:5 | Ca2+, Mn2+ | 21511590a | L21080900CRCR |
| WGA | CF680 | 1:1000 | Ca2+ | 29029b | 20W0527-1122158 |

Lectins were purchased as fluorophore conjugates from: aBioWORLD, Dublin, OH, USA, bBiotium, Fremont, CA, USA, or cVector laboratories, Burlingame, CA, USA.

## Supplementary Table 3 | Primary antibodies and labels used in this study

| **Antibody/ Label** | **Sub-type** | **Host** | **Clonality, №** | **Used dilution** | **Provider** | **Order №** | **Lot №** |
| --- | --- | --- | --- | --- | --- | --- | --- |
| **Fluorophore-conjugated primary antibodies or other direct labels** | | | | | | | |
| CHC17- AF647 | IgG1 | ms | mono, X22 | 1:30 | Novusbio | NB300-613AF647 | VL315162-070121-AF647 |
|  |  |  |  |  |  |  |  |
| DAPI | toxin | - | - | 1:5000 of  50 mg/ml | Invitrogen | D1306 | - |
| Hoechst-JF646 | bisbinzi-midine | - | - | 100 pM | Luke Lavis | - | - |
| Phalloidin-AF647 | toxin | - | - | 1:80 | ThermoFisher | A22287 | 1750839 |
| Phalloidin-AF680 | toxin | - | - | 1:80 | ThermoFisher | A22286 | 1709895 |
| VGlut1-AF647 | sdAb | ll | mono, Nb9 | 1:200 | NanoTag | N1605 | 220602 |
| VGlut1-CF680 | sdAb | ll | mono, Nb9 | 1:200 | NanoTag | N1605 | 12190101 |
| **Unconjugated primary antibodies** | | | | | | | |
| Bassoon | IgG2aκ | ms | mono, SAP7F407 | 1:200 | Enzo Life Sciences | ADI-VAM-PS003 | 02012005 |
| Cathepsin D | IgG | rb | poly | 1:200 | Cell Signalling | 69854 | 1 |
| EEA1 | IgG | rb | poly | 1:200 | Abcam | ab2900 | - |
| GLT1 | serum | gp | poly | 1:400 | Millipore | AB1783 | 3526283 |
| Fibrillarin | IgG | rb | poly | 1:200 | Abcam | ab5821 | GR293483-2 |
| Giantin | serum | gp | poly | 1:200 | SySy | 263004 | 263004/1 |
| GM130 | IgG1 | ms | mono, 35 | 1:200 | BD Biosciences | 610822 | 1145724 |
| Golgin97 | IgG | rb | poly | 1:70 | ThermoFisher | PA5-83719 | - |
| Homer1b/c | IgG | rb | poly | 1:400 | SySy | 160023 | 160023/2-11 |
| Lamin a/c | IgY | ch | poly | 1:200 | Biosensis | C1698-100 | C-1698-300-201307-SH |
| LAMP1 | IgG1 | ms | mono, H4A3 | 1:200 | Abcam | ab25630 | GR3395210-1 |
| LAMP1 | IgG | rb | poly | 1:200 | Abcam | ab24170 | GR3395210-1 |
| LAMP2A | IgG | gp | poly | 1:400 | SySy | 437005 | - |
| LAMP3 | IgG | gp | poly | 1:200 | SySy | 391005 | - |
| LAMP5 | IgG | gp | poly | 1:200 | SySy | 412005 | - |
| MAP2 | IgY | ch | poly | 1:500 | SySy | 188006 | 188006/1 |
| PDI | IgG1 | ms | mono, 1D3 | 1:400 | Enzo Life Sciences | ADI-SPA-891 | 03022019 |
| PEX14 | IgG | rb | poly | 1:200 | Novusbio | NPB2-33455 | A119064 |
| Piccolo | IgG | rb | poly | 1:200 | SySy | 142113 | 142113/1-3 |
| Rab3a | IgG1 | ms | mono, 42.2 | 1:200 | SySy | 107111 | 107111/1-20 |
| Rab5 | IgG | rb | poly | 1:200 | Abcam | ab18211 | 793878 |
| Rab7 | IgG | rb | mono, n.a. | 1:200 | Abcam | ab137029 | GR155792-64 |
| S100B | IgY | ch | poly | 1:400 | SySy | 287006 | 287006/1-4 |
| SCAMP1 | IgG | rb | poly | 1:200 | SySy | 121003 | - |
| Synapto-physin | IgG | rb | poly | 1:200 | SySy | 101002 | 101002/26 or 1-41 |
| Syntaxin6 | serum | rb | poly | 1:100 | SySy | 110062 | - |
| SV2 a/b/c | IgG1 | ms | mono | 1:200 | DSHB | AB2315387 | ABC214744 |
| TGN38 | IgG1 | ms | mono, Clone 2 | 1:100-1:200 | BD Biosciences | 610898 | 8274719 |
| TGN38 | serum | rb | poly | 1:100 |  | NB1-03495SS | RB0705-060908-WS |
| VAMP1 | serum | rb | poly | 1:500 | SySy | 104002 | 104002/1-16 |
| VAMP2 | IgG | rb | mono | 1:500 | SySy | 104008 | 104002/1-5 |
| VAMP4 | serum | rb | poly | 1:100 | SySy | 136002 | - |
| VAMP7 | IgG | ms | mono, 158.2 | 1:100 | SySy | 232011 | 232011/1-8 |
| VGlut1 | serum | gp | poly | 1:100 | Millipore | AB5905 | 3836436 |
| VGlut2 | IgY | ch | poly | 1:200 | SySy | 135416 | 135416/1-6 |

Abbreviations: AF647/680, Alexa Fluor 647/680; ch, chicken; gp, guinea pig; JF646, Janelia Fluor 646; ll, llama; mono, monoclonal; ms, mouse; n.a., not available; poly, polyclonal; rb, rabbit; sdAB, single domain antibody (nanobody); SySy, Synaptic Systems.

## Supplementary Table 4 | Secondary antibodies used in this study

| **Target/ Conjugate** | **Sub-type** | **Appli-cation** | **Host** | **Used dilution** | **Provider** | **Order №** | **Lot №** |
| --- | --- | --- | --- | --- | --- | --- | --- |
| anti-ms IgG/ AF488 | F(ab')2 | WF | gt | 1:400 | Invitrogen | A11017 | 262519 |
| anti-ms IgG/ AF647 | IgG (H+L) | WF | gt | 1:400 | Invitrogen | A21235 | 2369184 |
| anti-ms IgG/ AF647 | F(ab')2 | *d*STORM | dn | 1:400 | Abcam | ab181292 | GR3310174-2 |
| anti-ms IgG/ CF680 | IgG (H+L) | *d*STORM | gt | 1:400 | Sigma | SAB4600199 | 18C0130 |
|  |  |  |  |  |  |  |  |
| anti-rb IgG/ AF488 | IgG (H+L) | WF | gt | 1:400 | Invitrogen | A11008 | 2420731 |
| anti-rb IgG/ AF568 | IgG (H+L) | WF | gt | 1:400 | Invitrogen | A11011 | 2500544 |
| anti-rb IgG/ AF647 | IgG (H+L) | WF | gt | 1:400 | Invitrogen | A21245 | 264997 |
| anti-rb IgG/ AF647 | F(ab')2 | *d*STORM | dn | 1:400 | Abcam | ab181347 | GR3361186-1 |
| anti-rb IgG/ CF680 | F(ab')2 | *d*STORM | gt | 1:400 | Sigma | SAB4600362 | 16C0721 |
| anti-gp IgG/ AF488 | IgG (H+L) | WF | gt | 1:400 | Invitrogen | A11073 | 1990462 |
| anti-gp IgG/ CF680 | IgG (H+L) | *d*STORM | gt | 1:400 | Biotium | 20499 | 21C0104 |
|  |  |  |  |  |  |  |  |
| anti-ch IgY/ AF488 | IgG (H+L) | WF | gt | 1:400 | Invitrogen | A11039 | 2566343 |
| anti-ch IgY/ AF647 | IgG (H+L) | *d*STORM | gt | 1:400 | Invitrogen | A21449 | 1806124 |
|  |  |  |  |  |  |  |  |
|  |  |  |  |  |  |  |  |

All secondary antibodies used in this study were polyclonal. AF488/568/647, Alexa Fluor 488/568/647; ch, chicken; dn, donkey; gp, guinea pig; gt, goat; ms, mouse; rb, rabbit; WF, wide-field.

## Supplementary Table 5 | Composition of lectin elution buffers

| **Eluted lectin** | **Competing sugars** | **Order №** |
| --- | --- | --- |
| ABA | 0.2 M Gal-GalNAca | 21511278-1 |
| CAL | 0.2 M Bovine fetuina | 21511283-1 |
| Con A, HHA, PSA, LCA | 0.2 M α-Methylmannosidea | 21511337-1 |
| DBA | 0.2 M GalNAca | 21511031-1 |
| MAA II | 0.2 M Lactosea | 21511261-1 |
| PNA | 0.2 M Galactosea | 21511342-1 |
| POL | 0.1 M Mannoseb | 20120110-1 |
| PWA, WGA | 0.2 M Chitin hydrolysatea | 21511023-3 |
| UDA | 0.2 M Chitobiosea | 21511315-1 |
| UEA I, LTL | 0.2 M L-Fucosea | 21511316-1 |
| VEA | 0.2 M Glucosea | 21511318-1 |
| VVA | 0.1 M GalNAcb | 21510884-1 |
| WGA | 0.1 M GlcNAcb | 21510885-1 |

Competing sugars were purchased in following buffers:
a 10 mM Tris with 0.1 M or 1 M NaCl and 1 mM or 2 mM EDTA
b 1 M NaCl and 2 mM EDTA

## Supplementary Table 6 | Areas segmented for region-specific elution analysis

| **Eluted lectin** | **Segmented area** |
| --- | --- |
| Con A | Endoplasmic reticulum, round organelles |
| DBA | Cytosol |
| LCA | Round organelles |
| MAA II | Golgi apparatus, plasma membrane |
| POL | Endoplasmic reticulum, round organelles |
| PSA | Golgi |
| PWA | Round organelles (lysosomes) |
| UEA I | Round organelles |
| VEA | Golgi apparatus |
| VVA | Golgi apparatus |
| WGA | Endoplasmic reticulum, round organelles, nuclear pores |

## Supplementary Table 7 | Number of experiments and confocal or wide-field images acquired during initial lectin screening and elution

| **Lectin** | **Brain tissue** | **Hippocampal neurons** | **U2OS cells** |
| --- | --- | --- | --- |
| ABA | N = 7 | N = 2 | N = 2 |
| CAL | N = 2 | N = 2 | N = 1 |
| Con A | N = 22 | N = 7 | N = 4 |
| DBA | N = 12 | N = 4 | N = 6 |
| HHA | N = 4 | N = 1 | N = 1 |
| LCA | N = 10 | N = 3 | N = 5 |
| LTL | N = 7 | N = 3 | N = 5 |
| MAA II | N = 21 | N = 3 | N = 9 |
| PNA | N = 5 | N = 2 | N = 7 |
| POL | N = 11 | N = 8 | N = 3 |
| PSA | N = 16 | N = 13 | N = 11 |
| PWA | N = 11 | N = 5 | N = 9 |
| UDA | N = 6 | N = 4 | N = 1 |
| UEA I | N = 7 | N = 4 | N = 4 |
| VEA | N = 17 | N = 12 | N = 11 |
| VVA A | N = 21 | N = 12 | N = 11 |
| WGA | N > 30 | N = 15 | N = 11 |

N is the total number of experiments with 5 – 7 cells each.

## Supplementary Table 8 | Workflows for Glyco-STORM experiments in brain tissue

| **Round** | **Label in channel 1** | **Label in channel 2** | **Signal removal  (post-imaging)** |
| --- | --- | --- | --- |
| ***Experiment 1*** *used in Fig. 2a-c, Fig. S6 (nucleus)* | | | |
| 1 | MAA II-AF647 | - | Bleaching |
| 2 | (n.r.) | WGA-CF680 | Bleaching |
| 3 | Con A-AF647 | Fibrillarin::rb-CF680 | Bleaching |
| 4 | UDA-AF647 | Bassoon::ms-CF680 | Bleaching |
| 5 | (n.r.) | VGlut1::gp-CF680 | Elution, Bleaching |
| 6 | (n.r.) | Synaptophysin::rb-CF680 | Bleaching |
| 7 | Hoechst-JF646 | - | - |
| ***Experiment 2*** *used in Fig. 2c, Fig. S6 (nucleus)* | | | |
| 1 | DBA | Fibrillarin::rb-CF680 | Bleaching |
| 2 | Phalloidin-AF647 | WGA-CF680 | Bleaching |
| 3 | UDA-AF647 | SV2::ms-CF680 | Bleaching |
| 4 | Con A-AF647 | (n.r.) | Elution, Bleaching |
| 5 | (n.r.) | Bassoon::ms-CF680 | - |
| ***Experiment 3*** *used in Fig. 2c, Fig. S6 (nucleus); Fig. 2f-j (ER); Fig. 3c, Fig. S7a (Golgi); Fig. S9c (PLC/lysosome)* | | | |
| 1 | VVA-AF647 | - | Bleaching |
| 2 | VEA-AF647 | (n.r.) | Bleaching |
| 3 | PSA-AF647 | GM130::ms-CF680 | Bleaching |
| 4 | CHC17-AF647 | Giantin::gp-CF680 | Elution, Bleaching |
| 5 | PWA-AF647 | TGN38::ms-CF680 | Elution, Bleaching |
| 6 | MAA II-AF647 | (n.r.) | Bleaching |
| 7 | Con A-AF647 | WGA-CF680 | Elution, Bleaching |
| 8 | POL-AF647 | PEX14::rb-CF680 | Elution, Bleaching |
| 9 | PDI::ms-AF647 | - | - |
| ***Experiment 4*** *used in Fig. 2c, Fig. S6 (nucleus)* | | | |
| 1 | VVA-AF647 | Bassoon::ms-CF680 | Bleaching |
| 2 | GM130::ms-AF647 | Golgin97::rb-CF680 | Elution, Bleaching |
| 3 | (n.r.) | WGA-CF680 | Elution, Bleaching |
| 4 | Con A-AF647 | Synaptophysin::rb-CF680 | - |
| ***Experiment 5*** *used in Fig. 2b,c, Fig. S6 (nucleus); Fig. 2 f,g,j (ER); Fig. 3b,c, Fig. S7c (Golgi); Fig. 3d-g, Fig. S9c,d (PLC/lysosome); Fig. 5a, Fig. S13(i) (glycosylation map); Fig. S5 (precision analysis); Fig. S11a,b (perisynaptic structures)* | | | |
| 1 | LCA-AF647 | - | Bleaching |
| 2 | Phalloidin-AF647 | LAMP1::rb-CF680 | Bleaching |
| 3 | PWA-AF647 | LAMP3::gp-CF680 | Bleaching |
| 4 | CHC17-AF647 | WGA-CF680 | Elution, Bleaching |
| 5 | VGlut2::ch-AF647 | Bassoon::ms-CF680 | Elution, Bleaching |
| 6 | LTL-AF647 | EEA1::rb-CF680 | Elution, Bleaching |
| 7 | VAMP7::ms-AF647 | Homer1b/c::rb-CF680 | Elution, Bleaching |
| 8 | POL-AF647 | Rab5::rb-CF680 | Elution, Bleaching |
| 9 | PSA-AF647 | GM130::ms-CF680 | Elution, Bleaching |
| 10 | Con A-AF647 | Rab7::rb-CF680 | - |

| ***Experiment 6*** *used in Fig. 2b,c, Fig. S6 (nucleus); Fig. 2f,g (ER)* | | | |
| --- | --- | --- | --- |
| 1 | Con A-AF647 | - | Bleaching |
| 2 | (n.r.) | Bassoon::ms-CF680 | Bleaching |
| 3 | Rab7::rb-AF647 | VGlut1::gp-CF680 | Elution, Bleaching |
| 4 | LAMP1::rb-AF647 | (n.r.) | Elution, Bleaching |
| 5 | PDI::ms-AF647 | WGA-CF680 | - |
| ***Experiment 7*** *used in Fig. 2b,c, Fig. S6 (nucleus); Fig. 2e-g,j (ER); Fig. S9c,e (PLC/lysosome)* | | | |
| 1 | PSA-AF647 | LAMP1::ms-CF680 | Bleaching |
| 2 | LCA-AF647 | LAMP5::gp-CF680 | Bleaching |
| 3 | PWA-AF647 | SCAMP1::rb-CF680 | Bleaching |
| 4 | LTL-AF647 | LAMP2a::gp-CF680 | Elution, Bleaching |
| 5 | Con A-AF647 | EEA1::rb-CF680 | Elution, Bleaching |
| 6 | POL-AF647 | PDI::ms-CF680 | - |
| ***Experiment 8*** *used in Fig. 2b,c, Fig. S6 (nucleus); Fig. 3c, Fig. S7a (Golgi); Fig. S13a(ii)* *(glycosylation map); Fig. S9c (PLC/lysosome); Fig. S11c,d (perisynaptic structures)* | | | |
| 1 | VEA-AF647 | TGN38::ms-CF680 | Bleaching |
| 2 | VVA-AF647 | WGA-CF680 | Bleaching |
| 3 | PSA-AF647 | Giantin::gp-CF680 | Bleaching |
| 4 | PWA-AF647 | Homer1b/c::rb-CF680 | Elution, Bleaching |
| 5 | SV2::ms-AF647 | (n.r.) | Elution, Bleaching |
| 6 | MAA II-AF647 | GM130::ms-CF680 | Elution, Bleaching |
| 7 | LTL-AF647 | (n.r.) | - |
| ***Experiment 9*** *used in Fig. 2c, Fig. S6 (nucleus); Fig. 3c, Fig. S7a,b (Golgi); Fig. S13a(iii) (glycosylation map); Fig. S9c (PLC/lysosome)* | | | |
| 1 | VVA-AF647 | - | Bleaching |
| 2 | VEA-AF647 | (n.r.) | Bleaching |
| 3 | PSA-AF647 | WGA-CF680 | Bleaching |
| 4 | MAA II-AF647 | Giantin::gp-CF680 | Elution, Bleaching |
| 5 | Golgin97::rb-AF647 | TGN38::ms-CF680 | Elution, Bleaching |
| 6 | CHC17-AF647 | VAMP4::rb-CF680 | Elution, Bleaching |
| 7 | UEA I-DL649 | GM130::ms-CF680 | - |
| ***Experiment 10***  *used in Fig. 2c, Fig. S6 (nucleus); Fig. S9c (PLC/lysosome)* | | | |
| 1 | PSA-AF647 | - | Bleaching |
| 2 | Bassoon::ms-AF647 | (n.r.) | Bleaching |
| 3 | LCA-AF647 | WGA-CF680 | Elution, Bleaching |
| 4 | GM130::ms-AF647 | LAMP1::rb-CF680 | Elution, Bleaching |
| 5 | Synaptophysin::rb-AF647 | GLT1::gp-CF680 | - |
| ***Experiment 11***  *used in Fig. 2c, Fig. S6 (nucleus)* | | | |
| 1 | ABA-AF647 | - | Bleaching |
| 2 | Bassoon::ms-AF647 | Homer1b/c::rb-CF680 | Bleaching |
| 3 | Synaptophysin::rb-AF647 | GLT1::gp-CF680 | Bleaching |
| 4 | S100B::ch-AF647 | WGA-CF680 | Elution, Bleaching |
| 5 | UDA-AF647 | Rab5::rb-CF680 | - |

| ***Experiment 12*** *used in Fig. 2c, Fig. S6 (nucleus); Fig. S5 (precision analysis)* | | | |
| --- | --- | --- | --- |
| 1 | - | Bassoon::ms-CF680  Piccolo::gp-CF680 (cumulative) | Bleaching |
| 2 | UDA-AF647 | - | Bleaching |
| 3 | (n.r.) | WGA-CF680 | - |
| ***Experiment 13*** *used in Fig. 2b,c, Fig. S6 (nucleus)* | | | |
| 1 | UDA-AF647 | - | Bleaching |
| 2 | MAP2::ch-AF647 | Bassoon::ms-CF680 | Bleaching |
| 3 | - | WGA-CF680 | Bleaching |
| 4 | Phalloidin-AF647 | Rab5::rb-CF680 | - |
| ***Experiment 14***  *used in Fig. 2b,c, Fig. S6 (nucleus); Fig. 2d,f,g (ER); Fig. S5 (precision analysis)* | | | |
| 1 | Con A-AF647 | - | Bleaching |
| 2 | - | Piccolo::gp-CF680 | Bleaching |
| 3 | PDI::ms-AF647 | WGA-CF680 | Bleaching |
| 4 | Synaptophysin::rb-AF647 | - | - |
| ***Experiment 15*** *used in Fig. 2c, Fig. S6 (nucleus)* | | | |
| 1 | UDA-AF647 | WGA-CF680 | - |
| ***Experiment 16*** | | | |
| 1 | - | WGA-CF680 | - |
| ***Experiment 17*** | | | |
| 1 | PWA-AF647 | - | Bleaching |
| 2 | PSA-647 | WGA-CF680 | - |
| ***Experiment 18*** *used in Fig. 2c, Fig. S6 (nucleus)* | | | |
| 1 | DBA-AF647 | - | Bleaching |
| 2 | Synaptophysin::rb-AF647 | PDI::ms-CF680 | Bleaching |
| 3 | MAP2::ch-AF647 | Phalloidin-AF680 | - |
| ***Experiment 19*** *used in Fig. S5 (precision analysis)* | | | |
| 1 | VVA-AF647 | - | Bleaching |
| 2 | Bassoon::ms-AF647 | (n.r.) | Bleaching |
| 3 | VGlut2::ch-AF647 | WGA-CF680 | Bleaching |
| 4 | VEA-AF647 | Giantin::gp-CF680 | Elution, Bleaching |
| 5 | GM130::ms-AF647 | Homer1b/c::rb-CF680 | Elution, Bleaching |
| 6 | (n.r.) | LAMP3::gp-CF680 | Elution, Bleaching |
| 7 | VAMP7::ms-AF647 | TGN38::rb-CF680 | Elution, Bleaching |
| 8 | MAA II-AF647 | Golgin97::rb-CF680 | - |
| ***Experiment 20*** *used in Fig. 4a,c (synapse)* | | | |
| 1 | VGlut1::gp-AF647 | Bassoon::ms-CF680 Piccolo::rb-CF680 (cumulative) | Bleaching |
| 2 | VGlut2::ch-AF647 | Homer1b/c::rb-CF680 | Elution, Bleaching |
| 3 | CHC17-AF647 | WGA-CF680 | Elution, Bleaching |
| 4 | Synaptophysin::rb-AF647 | (n.r.) | Elution, Bleaching |
| 5 | VAMP2::rb-AF647 | SV2::ms-CF680 | Elution, Bleaching |
| 6 | VAMP1::rb-AF647 | Rab3a::ms-CF680 | Elution, Bleaching |
| 7 | PSA-AF647 | (n.r.) | - |

| ***Experiment 21*** *(synapse)* | | | | | |
| --- | --- | --- | --- | --- | --- |
| 1 | VGlut1::gp-AF647 | | Bassoon::ms-CF680 Piccolo::rb-CF680 (cumulative) | | Bleaching |
| 2 | PSA-647 | | WGA-CF680 | | Elution, Bleaching |
| 3 | VGlut2::ch-AF647 | | Homer1b/c::rb-CF680 | | Elution, Bleaching |
| 4 | CHC17-AF647 | | VGlut-CF680 | | Elution, Bleaching |
| 5 | Synaptophysin::rb-AF647 | | (n.r.) | | Elution, Bleaching |
| 6 | VAMP2::rb-AF647 | | SV2::ms-CF680 | | Elution, Bleaching |
| 7 | VAMP1::rb-AF647 | | Rab3a::ms-CF680 | | - |
| ***Experiment 22*** *used in Fig. 2b,c, Fig. S6 (nucleus)* | | | | | |
| 1 | Bassoon::ms-AF647 | | Piccolo::rb-CF680 | | Elution, Bleaching |
| 2 | (n.r.) | | Homer1b/c::rb-CF680 | | Elution, Bleaching |
| 3 | Synaptophysin::rb-AF647 | | WGA-CF680 | | Elution, Bleaching |
| 4 | DBA-AF647 | | (n.r.) | | - |
| ***Experiment 23***  *used in Fig. S5 (precision analysis)* | | | | | |
| 1 | Piccolo::rb-AF647 | | Bassoon::ms-CF680 | | Elution, Bleaching |
| 2 | (n.r.) | | Homer1b/c::rb-CF680 | | Bleaching |
| 3 | VGlut-AF647 (NB) | | VGlut-CF680 (NB) | | Elution, Bleaching |
| 4 | Synaptophysin::rb-AF647 | | WGA-CF680 | | - |
| ***Experiment 24***  *used in Fig. S9a,b (PLC/lysosome)* | | | | | |
| 1 | PWA-AF647 | Cathepsin D::rb-CF680 | | Elution, Bleaching | |
| ***Experiment 25***  *(PLC/lysosome)* | | | | | |
| 1 | PWA-AF647 | Cathepsin D::rb-CF680 | | Elution, Bleaching | |

In label names, a dash ‘-‘ symbolizes direct conjugation and a double colon ‘::’ symbolizes binding by a secondary antibody or nanobody. Abbreviations: AF647/680, Alexa Fluor 647/680; ch, chicken; gp, guinea pig; JF646, Janelia Fluor 646; ms, mouse; NB, nanobody; n.r., not relevant (if label did not work or has no relevance for this study); rb, rabbit.

## Supplementary Table 9 | Workflows for Glyco-STORM experiments in U2OS cells

| **Round** | **Label in channel 1** | **Label in channel 2** | **Signal removal  (post-imaging)** |
| --- | --- | --- | --- |
| ***Experiment 26;*** *used in Fig. S10a, Fig. S13b* | | | |
| 1 | VVA-AF647 | Golgin97::rb-CF680 | Bleaching |
| 2 | VEA-AF647 | GM130::ms-CF680 | Bleaching |
| 3 | PSA-AF647 | Giantin::gp-CF680 | Bleaching |
| 4 | CHC17-AF647 | WGA-CF680 | Elution, Bleaching |
| 5 | PWM-AF647 | TGN38::ms-CF680 | Elution, Bleaching |
| 6 | LAMP1::rb-AF647 | PDI::ms-CF680 | Elution, Bleaching |
| 7 | Con A-AF647 | EEA1::rb-CF680 | Elution, Bleaching |
| 8 | MAA II-AF647 | LAMP3::gp-CF680 | Elution, Bleaching |
| 9 | POL-AF647 | Rab7::rb-CF680 | - |
| ***Experiment 27;*** *used in Fig. S8a* | | | |
| 1 | VEA-AF647 | TGN38::ms-CF680 | Bleaching |
| 2 | VVA-AF647 | Golgin97::rb-CF680 | Bleaching |
| 3 | PSA-AF647 | GM130::ms-CF680 | Bleaching |
| 4 | CHC17-AF647 | Giantin::gp-CF680 | Bleaching |
| 5 | PWM-AF647 | WGA-CF680 | - |
| ***Experiment 28*** | | | |
| 1 | PSA-AF647 | Golgin97::rb-CF680 | Bleaching |
| 2 | VVA-AF647 | GM130::ms-CF680 | Bleaching |
| 3 | VEA-AF647 | Giantin::gp-CF680 | Elution, Bleaching |
| 4 | MAA II-AF647 | EEA1::rb-CF680 | Elution, Bleaching |
| 5 | CHC17-AF647 | WGA-CF680 | - |
| ***Experiment 29*** | | | |
| 1 | VEA-AF647 | Giantin::gp-CF680 | Bleaching |
| 2 | PSA-AF647 | GM130::ms-CF680 | - |
| ***Experiment 30*** | | | |
| 1 | VVA-AF647 | Giantin::gp-CF680 | Bleaching |
| 2 | PSA-AF647 | GM130::ms-CF680 | Bleaching |
| 3 | VEA-AF647 | Golgin97::rb-CF680 | Elution, Bleaching |
| 4 | MAA II-AF647 | Syntaxin6::rb-CF680 | - |
| ***Experiment 31*** | | | |
| 1 | DBA-AF647 | - | Bleaching |
| 2 | PNA-AF647 | WGA-CF680 | Bleaching |
| 3 | Lamin a/c::ch-AF647 | (n.r.) | Bleaching |
| 4 | UDA-AF647 | Fibrillarin::rb-CF680 | Bleaching |
| 5 | MAA II-AF647 | Con A-CF680 | Bleaching |
| 6 | Hoechst-JF646 | - | - |
| ***Experiment 32*** | | | |
| 1 | Con A-AF647 | EEA1::rb-CF680 | Bleaching |
| 2 | POL-AF647 | PDI::ms-CF680 | Bleaching |
| 3 | LCA-AF647 | LAMP5::gp-CF680 | Bleaching |
| 4 | PWM-AF647 | WGA-CF680 | Elution, Bleaching |
| 5 | UEA I-AF649 | LAMP1::ms-CF680 | Elution, Bleaching |
| 6 | CHC17-AF647 | Syntaxin6::rb-CF680 | Elution, Bleaching |
| 7 | SCAMP1::rb-AF647 | VAMP7::ms-CF680 | - |

In label names, a dash ‘-‘ symbolizes direct conjugation and a double colon ‘::’ symbolizes binding by a secondary antibody or nanobody. Abbreviations: AF647, Alexa Fluor 647; ch, chicken; gp, guinea pig; JF646, Janelia Fluor 646; ms, mouse; NB, nanobody; n.r., not relevant (if label did not work or has no relevance for this study); rb, rabbit.

## Supplementary Table 10 | Workflows for Glyco-STORM experiments in hippocampal neurons

| **Round** | **Label in channel 1** | **Label in channel 2** | **Signal removal  (post-imaging)** |
| --- | --- | --- | --- |
| ***Experiment 33*** *used in Fig. S8b, S10b, S13c* | | | |
| 1 | PSA-AF647 | TGN38::ms-CF680 | Bleaching |
| 2 | VVA-AF647 | GM130::ms-CF680 | Bleaching |
| 3 | VEA-AF647 | Giantin::gp-CF680 | - |
| ***Experiment 34*** | | | |
| 1 | PSA-AF647 | Golgin97::rb-CF680 | Bleaching |
| 2 | VVA-AF647 | GM130::ms-CF680 | - |
| ***Experiment 35*** | | | |
| 1 | PSA-AF647 | Bassoon::ms-CF680 | - |
| ***Experiment 36*** | | | |
| 1 | POL-AF647 | Bassoon::ms-CF680 | - |
| ***Experiment 37*** | | | |
| 1 | Bassoon::ms-AF647 | Con A-CF680 | - |
| ***Experiment 38*** | | | |
| 1 | Bassoon::ms-AF647 | WGA-CF680 | - |
| ***Experiment 39*** | | | |
| 1 | Homer1b/c::rb-AF647 | WGA-CF680 | - |
| ***Experiment 40*** | | | |
| 1 | Con A-AF647 | Homer1b/c::rb-CF680 | - |
| 2 | Bassoon::ms-AF647 | - |  |
| ***Experiment 41*** *used in Fig.4f,h, Fig. S12* | | | |
| 1 | PSA-AF647 | Homer1b/c::rb-CF680 | - |
| 2 | Bassoon::ms-AF647 |  |  |
| ***Experiment 42*** | | | |
| 1 | POL-AF647 | Homer1b/c::rb-CF680 | - |
| ***Experiment 43*** | | | |
| 1 | Homer1b/c::rb-AF647 | Con A-CF680 | - |
| ***Experiment 44*** | | | |
| 1 | POL-AF647 | (n.r.) | Elution, Bleaching |
| 2 | Bassoon::ms-AF647 | Homer1b/c::rb-CF680 | Elution, Bleaching |
| 3 | (n.r.) | WGA-CF680 | Elution, Bleaching |
| 4 | POL-AF647 | - | - |
| ***Experiment 45*** *used in Fig.4f* | | | |
| 1 | POL-AF647 | (n.r.) | Elution, Bleaching |
| 2 | Bassoon::ms-AF647 | Homer1b/c::rb-CF680 | Elution, Bleaching |
| 3 | (n.r.) | WGA-CF680 | - |
| ***Experiment 46*** *used in Fig. 4f* | | | |
| 1 | PSA-AF647 | (n.r.) | Elution, Bleaching |
|  | Bassoon::ms-AF647 | Homer1b/c::rb-CF680 | - |
| ***Experiment 47*** *used in Fig. 4f,h, Fig. S12* | | | |
| 1 | PSA-AF647 | (n.r.) | Elution, Bleaching |
| 2 | Bassoon::ms-AF647 | Homer1b/c::rb-CF680 | - |
| ***Experiment 48*** *used in Fig. 4f-h, Fig. S12* | | | |
| 1 | Con A-AF647 | Bassoon::ms-CF680 | Bleaching |
| 2 | Homer1b/c::rb-AF647 | WGA-CF680 | - |
| ***Experiment 49*** *used in Fig. 4f,h-j, Fig. S12* | | | |
| 1 | POL-AF647 | Homer1b/c::rb-CF680 | Bleaching |
| 2 | Bassoon::ms-AF647 | WGA-CF680 | - |
| ***Experiment 50*** *used in Fig. 4f* | | | |
| 1 | POL-AF647 | Bassoon::ms-CF680 | Bleaching |
| 2 | Homer1b/c::rb-AF647 | WGA-CF680 | Elution, Bleaching |
| 3 | (n.r.) | Con A-CF680 | - |
| ***Experiment 51*** *used in Fig. 4f* | | | |
| 1 | POL-AF647 | Bassoon::ms-CF680 | Bleaching |
| 2 | Homer1b/c::rb-AF647 | WGA-CF680 | Elution, Bleaching |
| 3 | (n.r.) | Con A-CF680 | - |
| ***Experiment 52*** *used in Fig.4f,h, Fig. S12* | | | |
| 1 | Con A-AF647 | Bassoon::ms-CF680 | Bleaching |
| 2 | Homer1b/c::rb-AF647 | WGA-CF680 | - |
| ***Experiment 53*** *used in Fig.4f,h, Fig. S12* | | | |
| 1 | PSA-AF647 | (n.r.) | Bleaching |
| 2 | Bassoon::ms-AF647 | Homer1b/c::rb-CF680 | - |
| ***Experiment 54*** *used in Fig. 4f-j, Fig. S12* | | | |
| 1 | Homer1b/c::rb-AF647 | WGA-CF680 | Bleaching |
| 2 | PSA-AF647 | Bassoon::ms-CF680 | - |
| ***Experiment 55*** *used in Fig. 4f,h, Fig. S12* | | | |
| 1 | Homer1b/c::rb-AF647 | WGA-CF680 | Bleaching |
| 2 | POL-AF647 | Bassoon::ms-CF680 | - |

In label names, a dash ‘-‘ symbolizes direct conjugation and a double colon ‘::’ symbolizes binding by a secondary antibody or nanobody. Abbreviations: AF647, Alexa Fluor 647; gp, guinea pig; ms, mouse; NB, nanobody; n.r., not relevant (if label did not work or has no relevance for this study); rb, rabbit.

## Supplementary Table References

1. Sueyoshi, S., Tsuji, T. & Osawa, T. Purification and characterization of four isolectins of mushroom (agaricus bisporus). *Biol. Chem. Hoppe. Seyler.* **366**, 213–222 (1985).

2. Bojar, D. *et al.* A Useful Guide to Lectin Binding: Machine-Learning Directed Annotation of 57 Unique Lectin Specificities. *ACS Chem. Biol.* **17**, 2993–3012 (2022).

3. Kolberg, J., Michaelsen, T. E. & Sletten, K. Properties of a Lectin Purified from the Seeds of Cicer arietinum * Brought to you by | New York University Bobst Li Authenticated Download Date Brought to you by | New York University Bobst Lib Authenticated. 655–664 (1983).

4. Gautam, A. K., Gupta, N., Narvekar, D. T., Bhadkariya, R. & Bhagyawant, S. S. Characterization of chickpea (Cicer arietinum L.) lectin for biological activity. *Physiol. Mol. Biol. Plants* **24**, 389–397 (2018).

5. RCSB PDB - 3CNA: STRUCTURE OF CONCANAVALIN A AT 2.4 ANGSTROMS PRECISION ANALYSIS. doi:https://doi.org/10.2210/pdb3CNA/pdb

6. THE STRUCTURE OF THE DOLICHOS BIFLORUS SEED LECTIN IN COMPLEX WITH THE FORSSMAN DISACCHARIDE. doi:https://doi.org/10.2210/pdb1LU1/pdb

7. Wu, A. M., Dudek, A. & Chen, Y. L. Recognition factors of Dolichos biflorus agglutinin (DBA) and their accommodation sites. *Glycoconj. J.* **40**, 383–399 (2023).

8. Etzler, M. E. & Kabat, E. A. Purification and characterization of a lectin (plant hemagglutinin) with blood group A specificity from Dolichos biflorus. *Biochemistry* **9**, 869–877 (1970).

9. Damme, E. J. M. Van, Peumans, W. J., Barre, A. & Rougé, P. Plant Lectins: A Composite of Several Distinct Families of Structurally and Evolutionary Related Proteins with Diverse Biological Roles. *CRC. Crit. Rev. Plant Sci.* **17**, 575–692 (1998).

10. RCSB PDB - 2EIG: Lotus tetragonolobus seed lectin (Isoform). doi:https://doi.org/10.2210/pdb2EIG/pdb

11. Kawaguchi, T., Matsumoto, I. & Osawa, T. Studies on hemagglutinins from Maackia amurensis seeds. *J. Biol. Chem.* **249**, 2786–2792 (1974).

12. Yang, Y. *et al.* Characterization, molecular cloning, and in silico analysis of a novel mannose-binding lectin from Polygonatum odoratum (Mill.) with anti-HSV-II and apoptosis-inducing activities. *Phytomedicine* **18**, 748–755 (2011).

13. RCSB PDB - 2LTN: DESIGN, EXPRESSION, AND CRYSTALLIZATION OF RECOMBINANT LECTIN FROM THE GARDEN PEA (PISUM SATIVUM). doi:https://doi.org/10.2210/pdb2LTN/pdb

14. Ng, T. B., Chan, Y. S., Ng, C. C. W. & Wong, J. H. Purification and Characterization of a Lectin from Green Split Peas (Pisum sativum). *Appl. Biochem. Biotechnol.* **177**, 1374–1385 (2015).

15. Trowbridge, I. S. Isolation and chemical characterization of a mitogenic lectin from Pisum sativum. *J. Biol. Chem.* **249**, 6004–6012 (1974).

16. Ahmad, E., Kamranur Rahman, S., Masood Khan, J., Varshney, A. & Hasan Khan, R. Phytolacca americana lectin (Pa-2; pokeweed mitogen): an intrinsically unordered protein and its conversion into partial order at low pH. *Biosci. Rep.* **30**, 125–134 (2010).

17. Heiskanen, A. *et al.* Glycomics of bone marrow-derived mesenchymal stem cells can be used to evaluate their cellular differentiation stage. *Glycoconj. J.* **26**, 367–384 (2009).

18. Beintema, J. J. & Peumans, W. J. The primary structure of stinging nettle (Urtica dioica) agglutinin A two-domain member of the hevein family. *FEBS Lett.* **299**, 131–134 (1992).

19. Frost, R. G., Reitherman, R. W., Miller, A. L. & Brien, J. S. O. Crude extracts of. **179**, 170–179 (1975).

20. Fornstedt, N. & Porath, J. Characterization studies on a new lectin found in seeds of Vicia ervilia. *FEBS Lett.* **57**, 187–191 (1975).

21. Goldstein, I. J. & Poretz, R. D. Isolation, Physicochemical Characterization, and Carbohydrate-Binding Specificity of Lectins. in *The Lectins* 33–247 (Elsevier, 1986). doi:10.1016/B978-0-12-449945-4.50007-5

22. Wright, C. S. Crystallographic elucidation of the saccharide binding mode in wheat germ agglutinin and its biological significance. *J. Mol. Biol.* **141**, 267–291 (1980).
